# Supplementary material for: Microbiota and Metabolite Profiling of Spoiled Spanish-Style Green Table Olives
Source: PubMed Central journal article supplement (PMC6316098; doi:10.3390/metabo8040073), 2018-10-31
Supplement: metabolites-08-00073-s001.pdf [file metabolites-08-00073-s001.pdf]

Table S1. Number of reads and genus diversity estimators for 16s rRNA amplicons from Manzanilla and Gordal samples at the post-fermentation stage.

| Sample <sup>a</sup> | Reads (bp) | MeanLength (bp) | Shannon | Simpson | CHAO1 |
|---------------------|------------|-----------------|---------|---------|-------|
| G (control)         | 66750      | 464.78          | 0.95    | 0.56    | 15    |
| GCC1                | 63439      | 457.07          | 0.83    | 0.38    | 28    |
| GCC2                | 116975     | 460.60          | 1.12    | 0.58    | 35    |
| GCL1                | 130128     | 461.06          | 0.80    | 0.40    | 39    |
| GCL2                | 61370      | 463.93          | 0.64    | 0.28    | 32    |
| GFC1                | 41505      | 463.93          | 1.19    | 0.57    | 26    |
| GFC2                | 41278      | 464.60          | 1.05    | 0.52    | 23    |
| GFL1                | 52341      | 464.60          | 0.70    | 0.31    | 34    |
| GFL2                | 56775      | 464.71          | 0.83    | 0.37    | 25    |
| M (control)         | 29930      | 441.81          | 0.83    | 0.42    | 29    |
| MCC1                | 76358      | 460.04          | 0.80    | 0.50    | 16    |
| MCC2                | 81597      | 461.15          | 0.99    | 0.54    | 33    |
| MCL1                | 82283      | 461.34          | 1.29    | 0.54    | 42    |
| MCL2                | 86826      | 460.66          | 1.00    | 0.42    | 41    |
| MFC1                | 97273      | 443.69          | 1.12    | 0.59    | 47    |
| MFC2                | 91625      | 459.52          | 1.08    | 0.55    | 51    |
| MFL1                | 69618      | 462.78          | 1.11    | 0.48    | 46    |
| MFL2                | 35337      | 458.70          | 0.78    | 0.32    | 19    |

<sup>a</sup> Results of G and M controls correspond to the blend of both duplicates. See Table 5 for the meanings of samples abbreviations.

Table S2. Number of reads and genus diversity estimators for ITS amplicons from Manzanilla and Gordal samples at the post-fermentation stage.

| Sample <sup>a</sup> | Reads<br>(bp) | MeanLength<br>(bp) | Shannon | Simpson | CHAO1 |
|---------------------|---------------|--------------------|---------|---------|-------|
| G (control)         | 48015         | 505.97             | 0.48    | 0.27    | 1     |
| GCC1                | 52714         | 426.93             | 0.01    | 0.00    | 13    |
| GCC2                | 49660         | 505.52             | 0.01    | 0.00    | 11    |
| GCL1                | 66403         | 505.45             | 0.05    | 0.02    | 16    |
| GCL2                | 52897         | 506.16             | 0.06    | 0.02    | 17    |
| GFC1                | 54532         | 497.78             | 0.07    | 0.02    | 3     |
| GFC2                | 36573         | 502.23             | 0.03    | 0.01    | 15    |
| GFL1                | 25600         | 505.76             | 0.43    | 0.18    | 15    |
| GFL2                | 33803         | 436.65             | 0.23    | 0.08    | 16    |
| M (control)         | 32310         | 510.80             | 0.19    | 0.07    | 1     |
| MCC1                | 39671         | 499.18             | 0.48    | 0.25    | 17    |
| MCC2                | 33530         | 502.70             | 0.02    | 0.00    | 18    |
| MCL1                | 33559         | 493.71             | 0.47    | 0.22    | 15    |
| MCL2                | 44605         | 506.16             | 0.41    | 0.18    | 17    |
| MFC1                | 64996         | 510.06             | 0.23    | 0.08    | 4     |
| MFC2                | 42917         | 505.74             | 0.64    | 0.31    | 17    |
| MFL1                | 51464         | 487.30             | 0.58    | 0.29    | 17    |
| MFL2                | 63070         | 505.49             | 0.65    | 0.33    | 18    |

<sup>a</sup>Results of G and M controls correspond to the blend of both duplicates. See Table 5 for the meanings of samples abbreviations.

Table S3. Pearson's correlation coefficients between the mean values of the relative abundance of microorganisms and the sensory spoilage descriptors<sup>a</sup>

| Microorganisms                   | Zapatera  | Butyric |
|----------------------------------|-----------|---------|
| Genus <i>Corynebacterium</i>     | 0.056     | 0.534   |
| Genus <i>Propionibacterium</i>   | 0.750*    | 0.468   |
| Unclassified <i>Bacillaceae</i>  | -0.874**  | -0.475  |
| Genus <i>Natronobacillus</i>     | -0.839**  | -0.365  |
| Genus <i>Oceanobacillus</i>      | -0.957*** | -0.175  |
| Genus <i>Lactobacillus</i>       | -0.630    | -0.677* |
| Genus <i>Ruminococcus</i>        | 0.581     | 0.734*  |
| Family <i>Cardiobacteriaceae</i> | 0.547     | 0.430   |
| Family <i>Enterobacteriaceae</i> | -0.374    | 0.435   |
| <i>Candida apicola</i>           | -0.536    | -0.405  |
| <i>Candida etchellsii</i>        | -0.767*   | -0.510  |
| <i>Candida pararugosa</i>        | -0.142    | 0.410   |
| <i>Dekkera bruxellensis</i>      | -0.319    | 0.307   |
| Family <i>Dipodascaceae</i>      | 0.158     | 0.441   |
| <i>Pichia manshurica</i>         | 0.169     | 0.074   |
| <i>Pichia membranifaciens</i>    | 0.009     | -0.496  |

<sup>a</sup> Asterisks denote statistical significance at  $p < 0.05$  (\*),  $p < 0.01$  (\*\*), and  $p < 0.001$  (\*\*\*).

Table S4. Pearson's correlation coefficients between bacterial communities and metabolites<sup>a</sup>

| Variables                | <i>Corynebacterium</i> | <i>Propionibacterium</i> | <i>Bacillaceae</i> | <i>Natronobacillus</i> | <i>Oceanobacillus</i> | <i>Lactobacillus</i> | <i>Ruminococcus</i> | <i>Cardiobacteriaceae</i> | <i>Enterobacteriaceae</i> |
|--------------------------|------------------------|--------------------------|--------------------|------------------------|-----------------------|----------------------|---------------------|---------------------------|---------------------------|
| Lactic acid              | -0.368                 | <b>-0.509*</b>           | <b>0.835***</b>    | <b>0.725**</b>         | <b>0.653**</b>        | <b>0.853***</b>      | <b>-0.604**</b>     | <b>-0.738***</b>          | -0.151                    |
| Succinic acid            | -0.123                 | <b>0.477*</b>            | -0.318             | <b>-0.490*</b>         | -0.197                | -0.056               | 0.264               | -0.054                    | 0.123                     |
| Acetic acid              | 0.025                  | <b>0.659**</b>           | <b>-0.511*</b>     | -0.281                 | <b>-0.576*</b>        | -0.032               | 0.218               | -0.044                    | -0.363                    |
| Propionic acid           | 0.067                  | <b>0.687**</b>           | <b>-0.706**</b>    | <b>-0.522*</b>         | <b>-0.692**</b>       | -0.366               | 0.462               | 0.251                     | -0.279                    |
| Butyric acid             | <b>0.532*</b>          | 0.375                    | -0.317             | -0.127                 | -0.284                | <b>-0.689**</b>      | 0.452               | <b>0.543*</b>             | 0.052                     |
| Isobutyric acid          | -0.259                 | -0.187                   | -0.050             | -0.133                 | -0.175                | -0.051               | 0.031               | 0.128                     | -0.306                    |
| Valeric acid             | 0.433                  | 0.290                    | -0.329             | -0.167                 | -0.317                | <b>-0.710**</b>      | 0.440               | <b>0.596**</b>            | 0.036                     |
| Caproic acid             | 0.271                  | 0.192                    | -0.244             | -0.126                 | -0.310                | <b>-0.514*</b>       | 0.257               | <b>0.477*</b>             | -0.069                    |
| Heptanoic acid           | 0.030                  | 0.102                    | -0.197             | -0.153                 | -0.294                | -0.354               | 0.181               | 0.356                     | -0.117                    |
| Cyclohexanoic acid       | -0.196                 | 0.286                    | -0.354             | -0.372                 | -0.221                | -0.312               | 0.286               | 0.267                     | 0.076                     |
| Ethanol                  | -0.220                 | -0.001                   | -0.238             | -0.284                 | -0.287                | 0.212                | -0.326              | -0.025                    | -0.124                    |
| 2-Butanol                | <b>0.630**</b>         | -0.106                   | -0.032             | -0.074                 | 0.301                 | -0.359               | 0.094               | 0.260                     | <b>0.963***</b>           |
| 1-Propanol               | <b>-0.794***</b>       | -0.129                   | 0.221              | -0.023                 | -0.021                | 0.430                | -0.206              | -0.293                    | <b>-0.608**</b>           |
| 1-Butanol                | -0.330                 | 0.103                    | -0.277             | -0.327                 | -0.359                | -0.348               | 0.373               | 0.321                     | -0.330                    |
| 1-Pentanol               | 0.003                  | 0.108                    | -0.286             | -0.235                 | -0.362                | <b>-0.483*</b>       | 0.411               | 0.412                     | -0.120                    |
| 3-Methyl-1-pentanol      | -0.334                 | 0.026                    | -0.295             | -0.391                 | -0.430                | 0.099                | -0.120              | 0.045                     | -0.312                    |
| 1-Hexanol                | -0.030                 | 0.034                    | -0.160             | -0.105                 | -0.319                | -0.251               | 0.109               | 0.284                     | -0.218                    |
| (Z)-3-Hexen-1-ol         | -0.103                 | -0.003                   | 0.050              | 0.210                  | 0.023                 | <b>0.607**</b>       | -0.339              | <b>-0.560*</b>            | -0.027                    |
| 2-Ethyl-1-hexanol        | -0.359                 | -0.300                   | -0.154             | -0.226                 | -0.180                | -0.320               | 0.089               | 0.441                     | -0.185                    |
| 1-Octanol                | 0.105                  | 0.073                    | <b>-0.571*</b>     | <b>-0.539*</b>         | <b>-0.613**</b>       | -0.444               | 0.146               | <b>0.516*</b>             | 0.091                     |
| Benzyl alcohol           | 0.143                  | 0.311                    | -0.369             | -0.213                 | -0.282                | -0.026               | -0.103              | 0.074                     | 0.099                     |
| Phenylethyl alcohol      | -0.140                 | 0.135                    | -0.262             | -0.243                 | -0.266                | 0.102                | -0.172              | 0.005                     | -0.045                    |
| Octanal                  | 0.296                  | -0.073                   | -0.180             | 0.019                  | -0.247                | -0.282               | 0.155               | 0.256                     | 0.031                     |
| Nonanal                  | 0.421                  | -0.068                   | -0.070             | 0.156                  | -0.304                | -0.269               | 0.001               | 0.298                     | -0.085                    |
| Benzaldehyde             | 0.228                  | 0.292                    | -0.384             | -0.246                 | -0.405                | -0.234               | 0.185               | 0.201                     | -0.158                    |
| 3,4-Dimethylbenzaldehyde | -0.315                 | -0.401                   | <b>0.873***</b>    | <b>0.752***</b>        | <b>0.695**</b>        | <b>0.765***</b>      | <b>-0.506*</b>      | <b>-0.696**</b>           | -0.210                    |

|                               |                 |               |                |               |                |                  |        |                 |                 |
|-------------------------------|-----------------|---------------|----------------|---------------|----------------|------------------|--------|-----------------|-----------------|
| Methyl propanoate             | -0.360          | <b>0.485*</b> | -0.265         | -0.253        | -0.429         | 0.217            | 0.188  | -0.289          | -0.441          |
| Propyl acetate                | -0.335          | -0.005        | -0.106         | -0.135        | -0.248         | <b>0.474*</b>    | -0.341 | -0.319          | -0.337          |
| Methyl 2-methylbutanoate      | -0.031          | -0.196        | 0.253          | 0.329         | 0.039          | 0.322            | -0.052 | -0.348          | -0.307          |
| Ethyl butanoate               | 0.085           | 0.325         | -0.118         | -0.172        | 0.043          | -0.244           | 0.033  | 0.231           | 0.257           |
| Propyl propanoate             | <b>-0.545*</b>  | 0.318         | -0.213         | -0.395        | -0.352         | 0.273            | -0.022 | -0.211          | <b>-0.516*</b>  |
| Methyl pentanoate             | 0.394           | -0.009        | -0.356         | -0.256        | -0.224         | <b>-0.777***</b> | 0.323  | <b>0.751***</b> | 0.313           |
| Ethyl pentanoate              | -0.250          | -0.175        | -0.177         | -0.201        | -0.102         | -0.267           | -0.077 | 0.427           | -0.069          |
| Methyl hexanoate              | 0.401           | -0.006        | -0.227         | -0.160        | -0.122         | <b>-0.569*</b>   | 0.130  | <b>0.578*</b>   | 0.325           |
| Propyl pentanoate             | -0.263          | 0.085         | -0.253         | -0.284        | -0.185         | -0.356           | 0.074  | 0.451           | -0.128          |
| Ethyl hexanoate               | 0.429           | -0.003        | -0.011         | -0.092        | 0.268          | -0.204           | 0.028  | 0.128           | <b>0.778***</b> |
| Methyl heptanoate             | -0.048          | -0.046        | -0.149         | -0.135        | -0.252         | -0.261           | 0.059  | 0.321           | -0.115          |
| Propyl hexanoate              | -0.192          | 0.002         | -0.175         | -0.197        | -0.097         | -0.274           | -0.074 | 0.412           | -0.086          |
| Methyl cyclohexanecarboxylate | -0.221          | 0.083         | -0.322         | -0.343        | -0.183         | -0.241           | 0.218  | 0.232           | 0.091           |
| Ethyl cyclohexanecarboxylate  | -0.189          | -0.038        | -0.286         | -0.323        | -0.155         | -0.278           | 0.093  | 0.340           | 0.117           |
| Benzyl propanoate             | -0.100          | 0.403         | <b>-0.574*</b> | -0.443        | <b>-0.481*</b> | -0.112           | 0.125  | 0.123           | -0.072          |
| 2-Phenylethyl acetate         | -0.150          | -0.051        | -0.131         | -0.194        | 0.014          | -0.049           | 0.099  | 0.024           | 0.307           |
| Methyl hydrocinnamate         | -0.254          | -0.169        | -0.329         | -0.376        | -0.174         | -0.266           | -0.026 | 0.406           | 0.158           |
| Benzyl pentanoate             | <b>0.561*</b>   | 0.419         | -0.180         | -0.083        | 0.058          | <b>-0.472*</b>   | 0.289  | 0.308           | 0.426           |
| <i>o</i> -Guaiacol            | 0.012           | 0.107         | -0.382         | -0.266        | -0.442         | 0.003            | -0.159 | 0.128           | -0.155          |
| <i>p</i> -Creosol             | 0.359           | 0.200         | <b>-0.590*</b> | -0.405        | <b>-0.582*</b> | <b>-0.744***</b> | 0.305  | <b>0.760***</b> | -0.007          |
| Phenol                        | -0.043          | 0.112         | -0.446         | -0.376        | -0.390         | 0.022            | -0.173 | 0.109           | 0.042           |
| <i>p</i> -Ethyl guaiacol      | 0.468           | 0.068         | -0.099         | -0.187        | 0.202          | -0.254           | 0.146  | 0.125           | <b>0.873***</b> |
| <i>p</i> -Cresol              | <b>0.619***</b> | 0.059         | -0.434         | -0.184        | <b>-0.500*</b> | -0.443           | -0.016 | <b>0.517*</b>   | 0.100           |
| 4-Ethyl phenol                | 0.428           | -0.132        | -0.107         | -0.193        | 0.188          | -0.214           | -0.019 | 0.183           | <b>0.893***</b> |
| Linalool                      | <b>0.508*</b>   | 0.012         | -0.095         | 0.109         | 0.029          | 0.184            | -0.224 | -0.190          | 0.435           |
| $\alpha$ -Terpineol           | <b>-0.470*</b>  | 0.192         | -0.247         | -0.415        | -0.284         | -0.340           | 0.322  | 0.340           | -0.295          |
| Dimethyl sulfide              | 0.357           | -0.019        | 0.097          | 0.382         | 0.036          | 0.015            | -0.004 | -0.083          | 0.085           |
| Styrene                       | -0.055          | -0.219        | -0.097         | -0.122        | 0.035          | -0.076           | -0.185 | 0.212           | 0.109           |
| 3-Ethylpyridine               | 0.234           | -0.079        | 0.442          | <b>0.498*</b> | <b>0.544*</b>  | <b>0.524*</b>    | -0.209 | <b>-0.643**</b> | <b>0.470*</b>   |

|                          |               |       |        |        |        |        |        |        |                 |
|--------------------------|---------------|-------|--------|--------|--------|--------|--------|--------|-----------------|
| 3-Ethyl-4-methylpyridine | <b>0.576*</b> | 0.093 | 0.166  | 0.226  | 0.410  | 0.025  | 0.067  | -0.224 | <b>0.843***</b> |
| 1,4-Dimethoxybenzene     | 0.397         | 0.035 | -0.246 | -0.219 | -0.064 | -0.063 | -0.101 | 0.075  | <b>0.541*</b>   |

---

<sup>a</sup>Values in bold are different from 0. Asterisks denote significance at  $p < 0.05$  (\*),  $p < 0.01$  (\*\*), and  $p < 0.001$  (\*\*\*).

Table S5. Pearson's correlation coefficients between yeast communities and metabolites<sup>a</sup>

| Variables           | <i>Candida apicola</i> | <i>Candida etchellsii</i> | <i>Candida pararugosa</i> | <i>Dekkera bruxellensis</i> | <i>Dipodascaceae</i> | <i>Pichia manshurica</i> | <i>Pichia membranifaciens</i> |
|---------------------|------------------------|---------------------------|---------------------------|-----------------------------|----------------------|--------------------------|-------------------------------|
| Lactic acid         | <b>0.703**</b>         | <b>0.667**</b>            | -0.160                    | 0.094                       | -0.276               | -0.079                   | -0.143                        |
| Succinic acid       | -0.239                 | -0.084                    | 0.261                     | <b>-0.525*</b>              | -0.363               | 0.041                    | 0.347                         |
| Ethanol             | -0.183                 | 0.250                     | -0.192                    | -0.205                      | -0.434               | -0.090                   | 0.311                         |
| Acetic acid         | -0.030                 | -0.193                    | -0.323                    | -0.084                      | 0.057                | -0.140                   | 0.157                         |
| Propionic acid      | -0.326                 | <b>-0.473*</b>            | -0.116                    | -0.175                      | 0.023                | -0.050                   | 0.325                         |
| Butyric acid        | -0.333                 | -0.441                    | 0.068                     | 0.351                       | <b>0.522*</b>        | 0.215                    | -0.239                        |
| Isobutyric acid     | -0.165                 | 0.303                     | -0.062                    | 0.132                       | -0.148               | -0.212                   | -0.023                        |
| Valeric acid        | -0.360                 | -0.446                    | 0.262                     | 0.229                       | 0.448                | 0.225                    | -0.210                        |
| Caproic acid        | -0.269                 | -0.294                    | 0.347                     | 0.133                       | 0.352                | 0.159                    | -0.235                        |
| Heptanoic acid      | -0.184                 | -0.189                    | 0.464                     | -0.059                      | 0.153                | 0.057                    | -0.136                        |
| Cyclohexanoic acid  | -0.139                 | -0.360                    | 0.001                     | -0.170                      | -0.128               | -0.249                   | 0.373                         |
| 2-Butanol           | -0.277                 | -0.230                    | 0.314                     | -0.059                      | 0.358                | -0.108                   | -0.259                        |
| 1-Propanol          | 0.260                  | 0.468                     | -0.202                    | -0.292                      | <b>-0.704**</b>      | 0.277                    | 0.405                         |
| 1-Butanol           | -0.189                 | -0.099                    | 0.302                     | -0.062                      | -0.210               | 0.281                    | 0.184                         |
| 1-Pentanol          | -0.207                 | -0.292                    | 0.406                     | -0.082                      | 0.162                | 0.109                    | -0.065                        |
| 3-Methyl-1-pentanol | -0.264                 | 0.400                     | -0.022                    | -0.296                      | -0.408               | 0.080                    | 0.144                         |
| 1-Hexanol           | -0.092                 | -0.095                    | 0.357                     | -0.063                      | 0.145                | 0.078                    | -0.166                        |
| (Z)-3-Hexen-1-ol    | 0.427                  | 0.206                     | -0.170                    | -0.121                      | -0.080               | -0.240                   | -0.013                        |
| 2-Ethyl-1-hexanol   | -0.203                 | -0.170                    | 0.236                     | -0.056                      | -0.287               | 0.430                    | 0.312                         |
| 1-Octanol           | <b>-0.562*</b>         | -0.138                    | 0.099                     | -0.354                      | 0.007                | -0.128                   | 0.081                         |
| Benzyl alcohol      | -0.221                 | -0.203                    | -0.199                    | -0.093                      | -0.068               | -0.216                   | 0.261                         |
| Phenylethyl alcohol | -0.201                 | -0.014                    | -0.240                    | -0.230                      | -0.352               | -0.304                   | 0.427                         |
| Octanal             | -0.155                 | -0.253                    | -0.312                    | 0.130                       | 0.335                | -0.140                   | -0.073                        |
| Nonanal             | -0.101                 | -0.266                    | -0.177                    | -0.019                      | <b>0.566*</b>        | -0.205                   | -0.318                        |

|                               |                 |                |               |        |                |        |                 |
|-------------------------------|-----------------|----------------|---------------|--------|----------------|--------|-----------------|
| Benzaldehyde                  | -0.282          | -0.418         | -0.432        | -0.074 | 0.151          | 0.186  | 0.228           |
| 3,4-Dimethylbenzaldehyde      | <b>0.657**</b>  | <b>0.497*</b>  | -0.262        | 0.196  | -0.283         | -0.097 | 0.001           |
| Methyl propanoate             | 0.061           | 0.056          | -0.056        | -0.465 | -0.242         | -0.201 | 0.222           |
| Propyl acetate                | 0.178           | <b>0.489*</b>  | -0.213        | -0.253 | -0.197         | -0.072 | -0.072          |
| Methyl 2-methylbutanoate      | 0.322           | 0.314          | 0.133         | 0.058  | 0.203          | 0.106  | -0.444          |
| Ethyl butanoate               | -0.102          | -0.177         | -0.061        | 0.079  | -0.075         | -0.126 | 0.208           |
| Propyl propanoate             | 0.015           | 0.343          | -0.267        | -0.394 | -0.461         | 0.058  | 0.286           |
| Methyl pentanoate             | <b>-0.475*</b>  | <b>-0.506*</b> | 0.295         | 0.214  | 0.396          | 0.013  | -0.116          |
| Ethyl pentanoate              | -0.185          | -0.175         | 0.072         | 0.163  | -0.246         | -0.092 | 0.341           |
| Methyl hexanoate              | -0.351          | -0.332         | 0.290         | 0.218  | 0.402          | 0.014  | -0.235          |
| Propyl pentanoate             | -0.194          | -0.254         | -0.022        | 0.094  | -0.283         | 0.099  | 0.441           |
| Ethyl hexanoate               | -0.151          | -0.124         | -0.077        | -0.001 | 0.234          | -0.107 | -0.117          |
| Methyl heptanoate             | -0.154          | -0.124         | <b>0.499*</b> | -0.110 | 0.111          | 0.072  | -0.147          |
| Propyl hexanoate              | -0.154          | -0.186         | -0.011        | 0.190  | -0.211         | 0.034  | 0.326           |
| Methyl cyclohexanecarboxylate | -0.190          | -0.330         | -0.021        | -0.148 | -0.151         | -0.222 | 0.381           |
| Ethyl cyclohexanecarboxylate  | -0.195          | -0.302         | -0.113        | -0.055 | -0.137         | -0.191 | 0.370           |
| Benzyl propanoate             | -0.282          | -0.286         | -0.119        | -0.218 | -0.163         | -0.219 | 0.391           |
| 2-Phenylethyl acetate         | -0.092          | 0.107          | -0.107        | -0.102 | -0.171         | -0.193 | 0.134           |
| Methyl hydrocinnamate         | -0.332          | -0.208         | 0.136         | -0.116 | -0.337         | -0.192 | 0.445           |
| Benzyl pentanoate             | -0.260          | -0.300         | 0.347         | 0.318  | 0.353          | 0.261  | -0.239          |
| <i>o</i> -Guaiacol            | -0.270          | -0.083         | -0.233        | -0.189 | -0.004         | -0.270 | 0.137           |
| <i>p</i> -Creosol             | <b>-0.611**</b> | -0.460         | 0.226         | 0.057  | 0.269          | 0.243  | -0.014          |
| Phenol                        | -0.260          | -0.059         | -0.079        | -0.290 | -0.127         | -0.273 | 0.203           |
| <i>p</i> -Ethyl guaiacol      | -0.235          | -0.153         | -0.001        | -0.160 | 0.208          | -0.138 | -0.088          |
| <i>p</i> -Cresol              | <b>-0.478*</b>  | -0.244         | 0.106         | 0.038  | <b>0.566*</b>  | -0.151 | -0.392          |
| 4-Ethyl phenol                | -0.290          | 0.025          | 0.320         | -0.221 | 0.165          | -0.182 | -0.235          |
| linalool                      | 0.076           | 0.054          | 0.111         | 0.009  | 0.413          | -0.212 | -0.450          |
| $\alpha$ -Terpineol           | -0.281          | -0.190         | -0.027        | -0.237 | <b>-0.491*</b> | 0.126  | <b>0.603**</b>  |
| Dimethyl sulfide              | 0.362           | -0.098         | 0.115         | 0.116  | <b>0.646**</b> | 0.051  | <b>-0.598**</b> |



|                          |                |        |        |        |        |        |        |
|--------------------------|----------------|--------|--------|--------|--------|--------|--------|
| Styrene                  | -0.234         | -0.072 | -0.018 | 0.146  | -0.099 | -0.024 | 0.152  |
| 3-Ethylpyridine          | <b>0.617**</b> | 0.121  | -0.066 | 0.001  | 0.246  | -0.270 | -0.302 |
| 3-Ethyl-4-methylpyridine | 0.201          | -0.142 | 0.052  | -0.047 | 0.430  | -0.234 | -0.329 |
| 1,4-Dimethoxybenzene     | -0.173         | -0.041 | 0.023  | -0.200 | 0.206  | -0.206 | -0.161 |

---

<sup>a</sup>Values in bold are different from 0. Asterisks denote significance at  $p < 0.05$  (\*),  $p < 0.01$  (\*\*), and  $p < 0.001$  (\*\*\*)

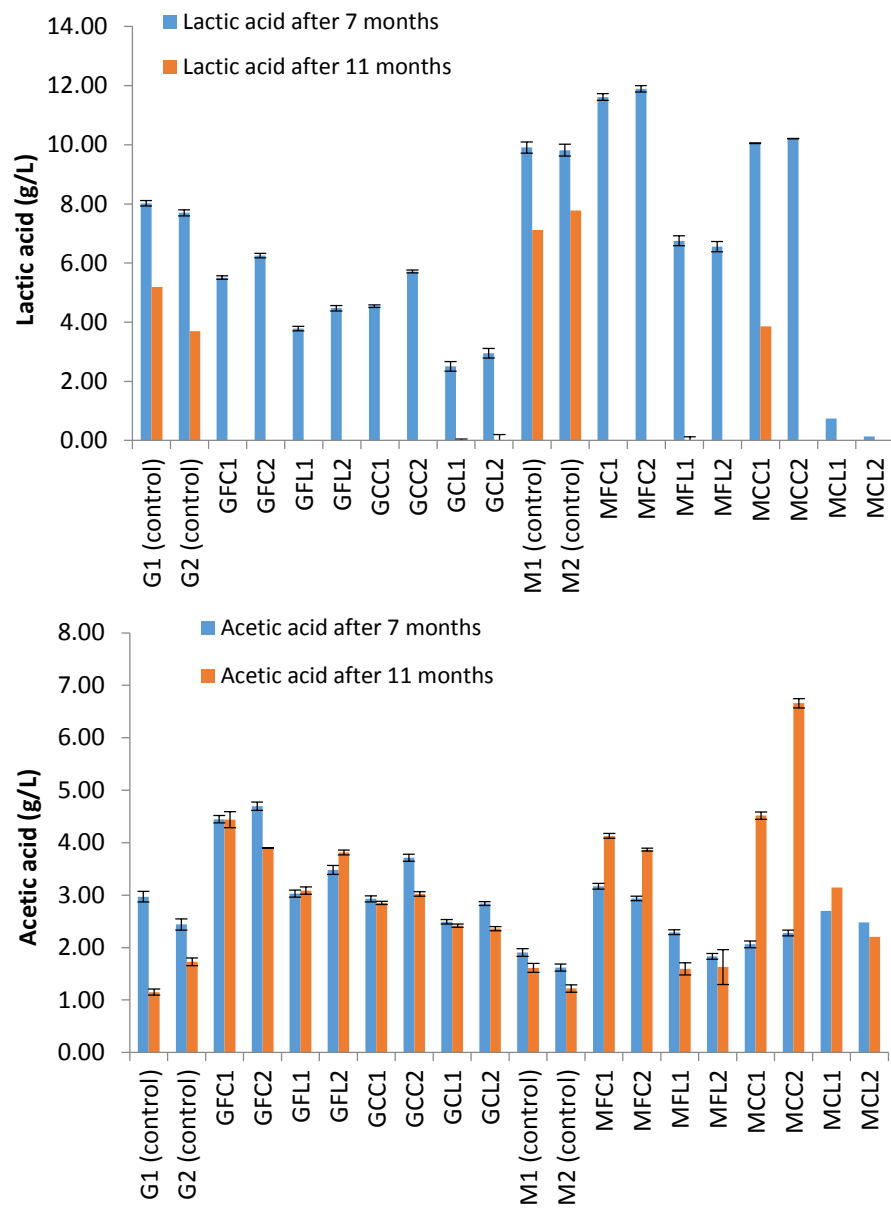

Figure S1. Concentrations of lactic and acetic acids in brine samples after 7 and 11 months of brining. Error bars denote standard deviations of triplicate analyses. See Table 5 for the meanings of samples abbreviations.

## total volatile phenols

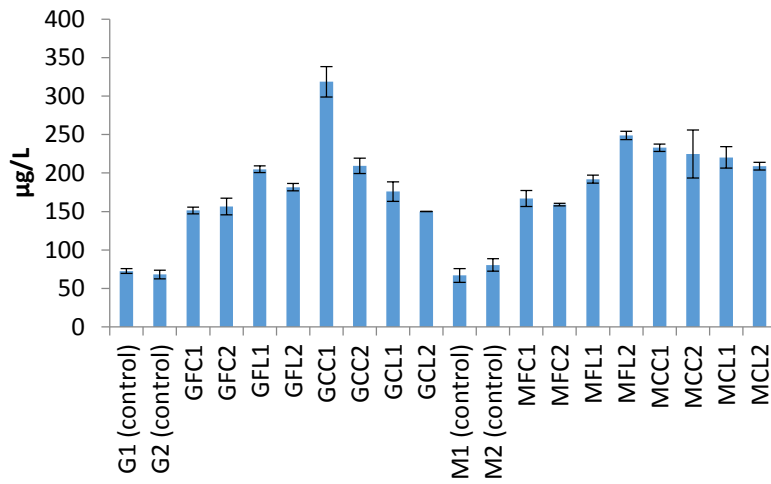

## total volatile acids

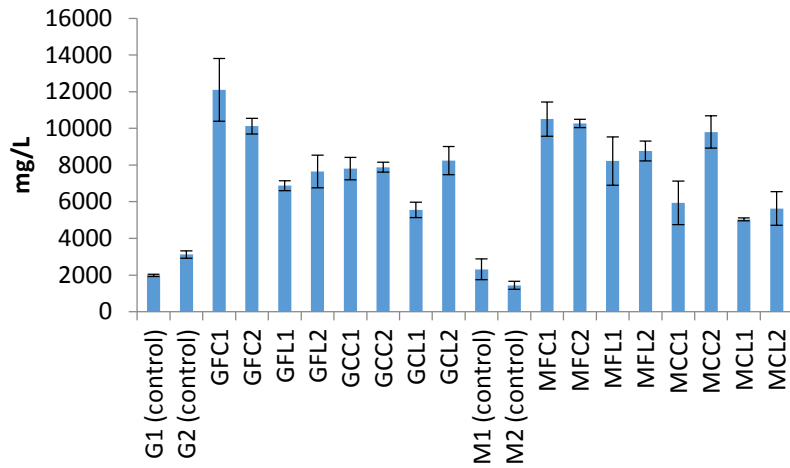

Figure S2. Total contents of volatile acids and phenols in brine samples. Error bars indicate 95% confidence intervals. See Table 5 for the meanings of samples abbreviations.

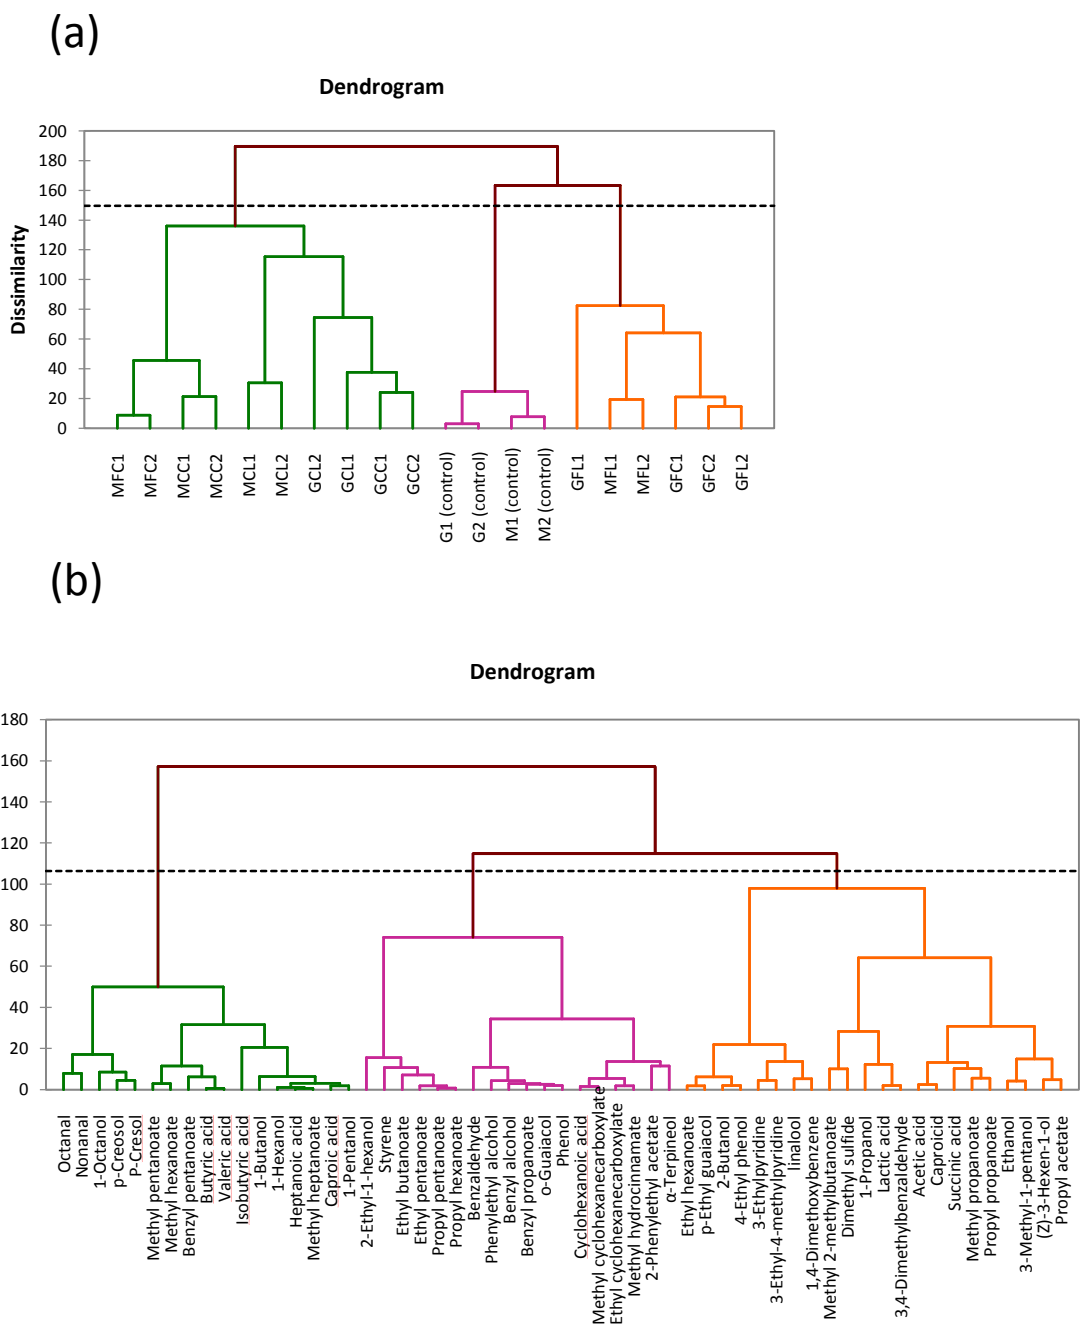

Figure S3. Dendrogram of (a) the observations (samples), and (b) variables (metabolites) from chemical data obtained by agglomerative hierarchical cluster (AHC) analysis. See Table 5 for the meanings of samples abbreviations.

(a)

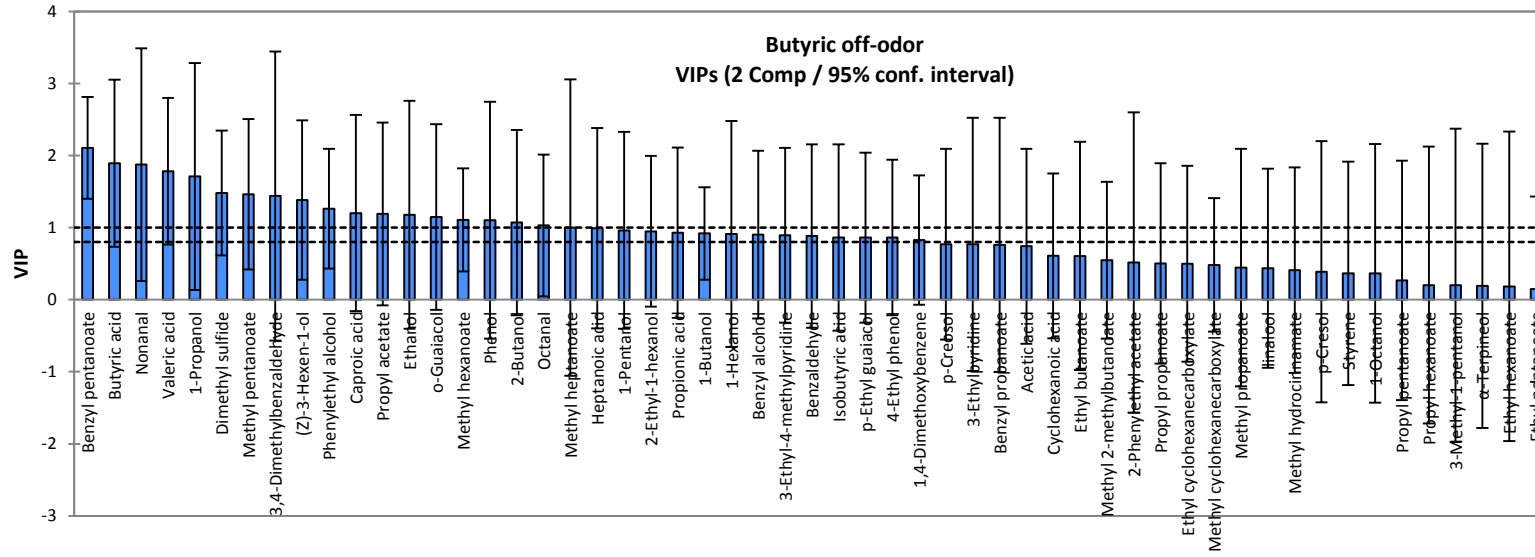

(b)

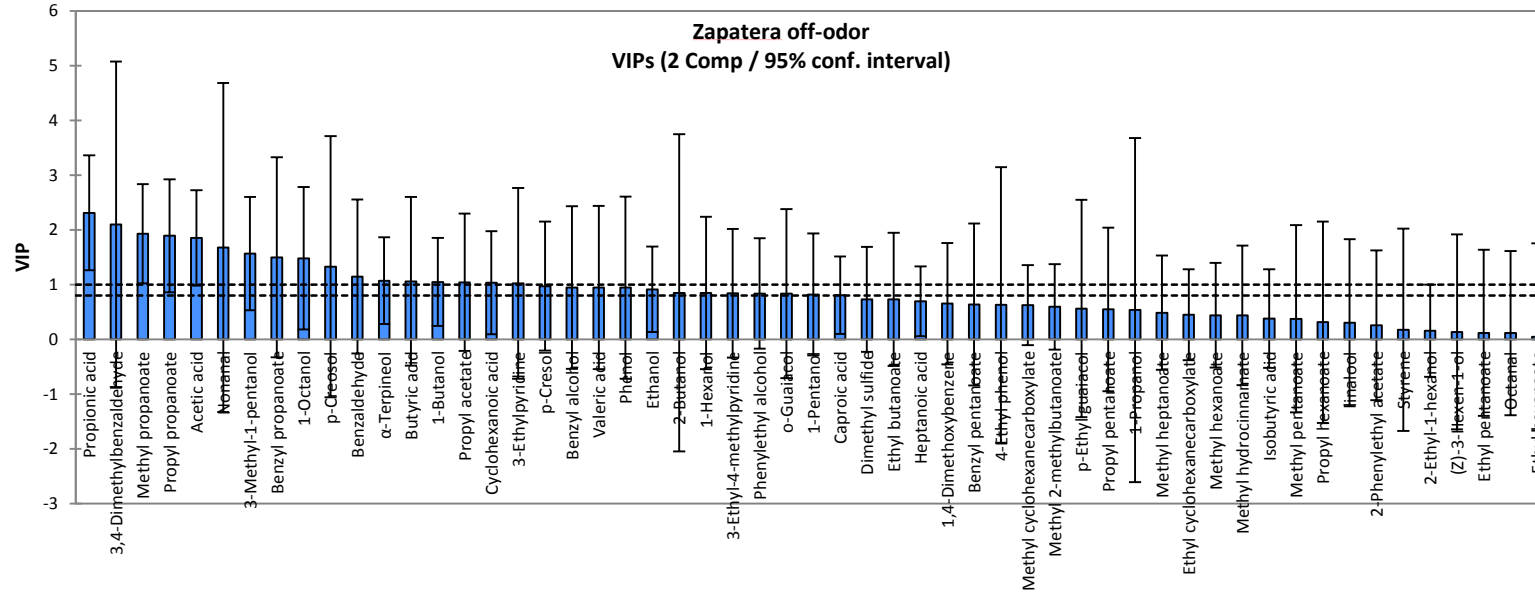

Figure S4. Plot of VIPs (sorted in descending order) with jack-knife uncertainty bars (95%) from the PLS regression between: (a) volatile metabolites and butyric descriptor, and (b) volatile metabolites and zapatera descriptor.
